# Supplementary material for: Cue-inhibited ventrolateral periaqueductal gray neurons signal fear output and threat probability in male rats
Source: eLife journal article supplement (doi:10.7554/elife.50054), 2019-09-30
Supplement: supp [file elife-50054-supp-v1.zip]

Archive with 2 entries (2 files):
- elife_poa_e50054_Transparent_Reporting_File.pdf
- elife_poa_e50054_Figure_2_figure_supplement_1.tif
