# Supplementary figures and images for: Cue-inhibited ventrolateral periaqueductal gray neurons signal fear output and threat probability in male rats
Source: eLife journal article supplement (doi:10.7554/elife.50054), 2019-09-30

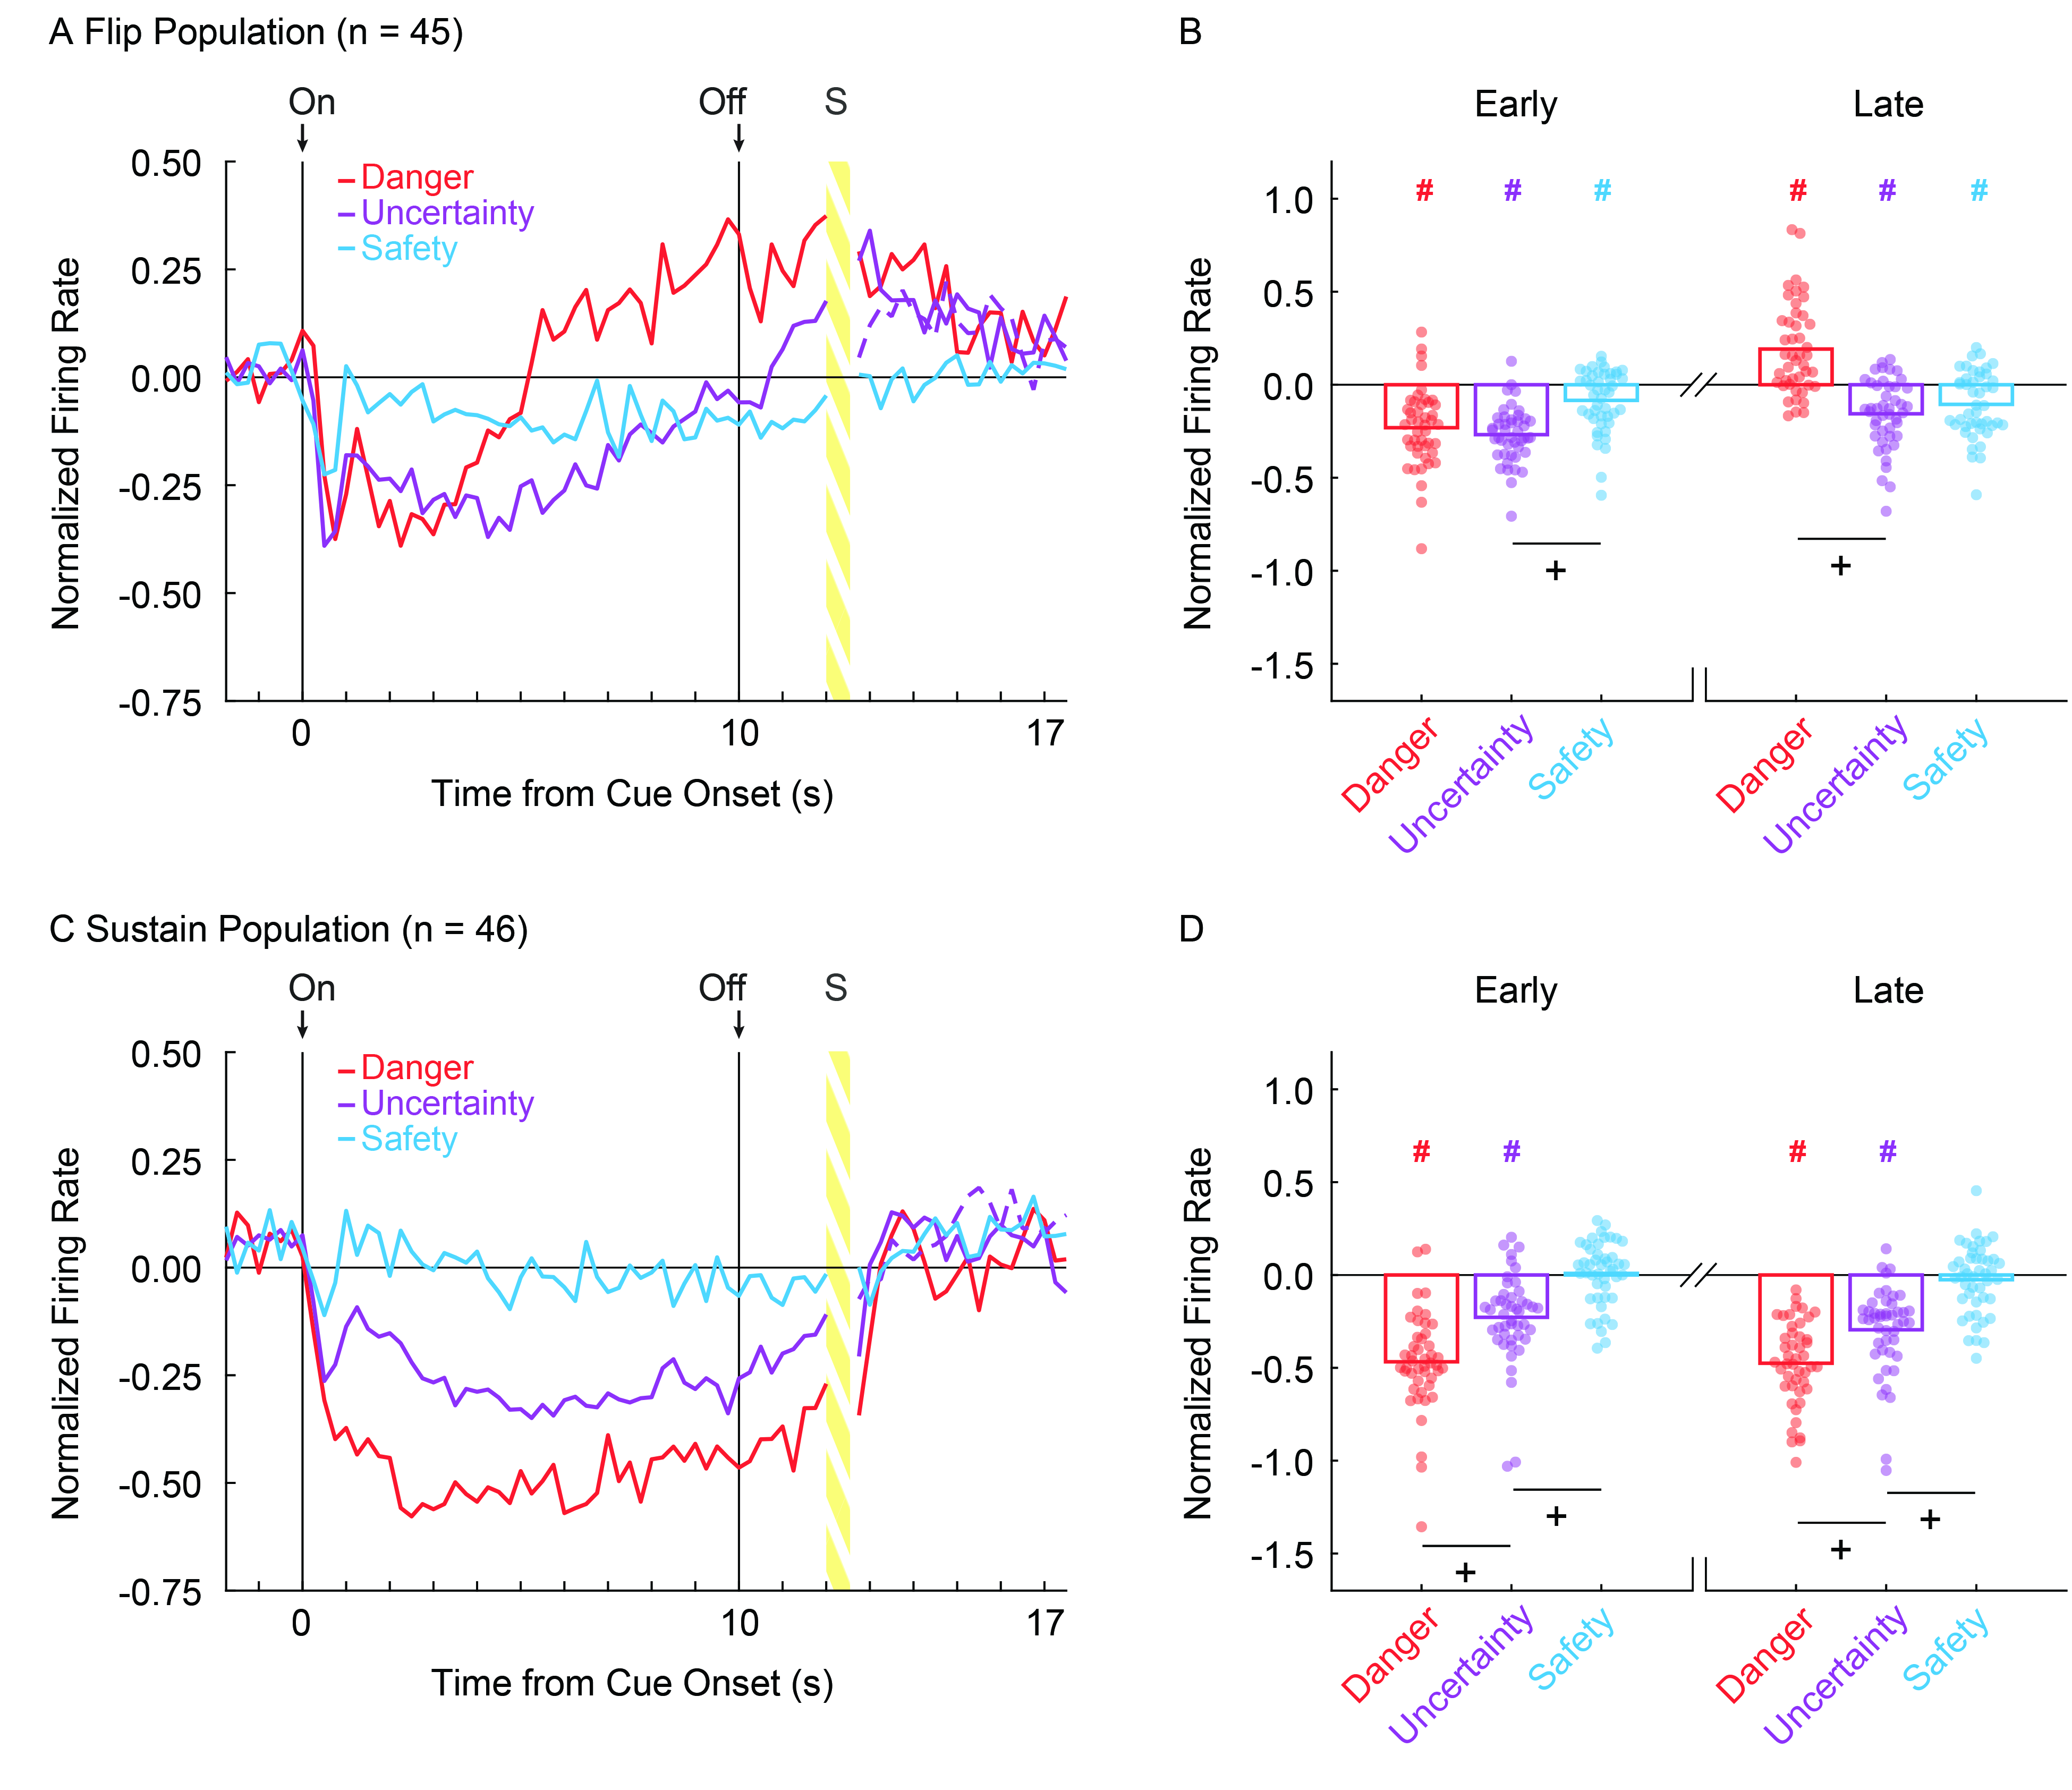

Supplement: supp [file elife-50054-supp-v1.zip › elife_poa_e50054_Figure_2_figure_supplement_1.tif]
